# Supplementary material for: A Study on the Characteristics and Influencing Factors of Soundscape Perception in Landscape Spaces of Urban Greenways
Source: MDPI journal article supplement (doi:10.3390/f15040670), 2024-04-08
Supplement: s1 [file s1]

## Questionnaire (Surveyor:

Location:

Time:

Weather: )

### I. Basic information on respondents

#### \*1. Gender

☐ Male ☐ Female

#### \*2. Age

☐ <18 ☐ 18–24 ☐ 25–30 ☐ 31–40  
☐ 41–50 ☐ 51–60 ☐ 61–70 ☐ >70

#### \*3. Educational attainment

☐ Junior high school or below  
☐ Senior high school or secondary school  
☐ Bachelor's degree or college  
☐ Postgraduate student and above

#### \*4. Occupation

☐ Tradesperson  
☐ Student  
☐ Not working

#### \*5. The feeling of stress in life

☐ Tiny ☐ A Little Bit  
☐ Average ☐ A lot  
☐ Very much

#### \*6. Type of residence

☐ Foreign Tourists  
☐ Local Tourists  
☐ Neighboring Residents

#### \*7. Frequency of visits

☐ Multiple times per week  
☐ Once per week  
☐ Once per month  
☐ Two to four times per month  
☐ One time in several months  
☐ First time

#### \*8. Length of visit

☐ Less than 1h  
☐ 1–2h  
☐ 2–3h  
☐ 3–4h  
☐ Half a day and more

### II. Evaluation of sound source perception

#### (i) Perceived Frequency, Perceived Intensity, Preferences

##### \*1. Natural sound:

##### ① Sound of frogs

##### Perceived Frequency

☐ Very infrequent ☐ Quite infrequent  
☐ Average ☐ Quite frequent  
☐ Very frequent

##### Perceived Strength

☐ Extremely weak ☐ Quite weak ☐ Average  
☐ Quite strong ☐ Extremely strong

##### Preference

☐ Extremely disliked ☐ Quite disliked  
☐ Average ☐ Favored ☐ Extremely favored

##### ② Cicadas singing

##### Perceived Frequency

☐ Very infrequent ☐ Quite infrequent  
☐ Average ☐ Quite frequent  
☐ Very frequent

##### Perceived Strength

☐ Extremely weak ☐ Quite weak ☐ Average  
☐ Quite strong ☐ Extremely strong

##### Preference

☐ Extremely disliked ☐ Quite disliked  
☐ Average ☐ Favored ☐ Extremely favored

### ③ Birds singing

#### Perceived Frequency

- ☐ Very infrequent      ☐ Quite infrequent  
☐ Average              ☐ Quite frequent  
☐ Very frequent

#### Perceived Strength

- ☐ Extremely weak    ☐ Quite weak    ☐ Average  
☐ Quite strong      ☐ Extremely strong

#### Preference

- ☐ Extremely disliked    ☐ Quite disliked  
☐ Average    ☐ Favored    ☐ Extremely favored

### ④ The sound of the wind blowing leaves

#### Perceived Frequency

- ☐ Very infrequent      ☐ Quite infrequent  
☐ Average              ☐ Quite frequent  
☐ Very frequent

#### Perceived Strength

- ☐ Extremely weak    ☐ Quite weak    ☐ Average  
☐ Quite strong      ☐ Extremely strong

#### Preference

- ☐ Extremely disliked    ☐ Quite disliked  
☐ Average    ☐ Favored    ☐ Extremely favored

### \*2. Artificial sound:

#### ① The sound of talking

##### Perceived Frequency

- ☐ Very infrequent      ☐ Quite infrequent  
☐ Average              ☐ Quite frequent  
☐ Very frequent

##### Perceived Strength

- ☐ Extremely weak    ☐ Quite weak    ☐ Average  
☐ Quite strong      ☐ Extremely strong

##### Preference

- ☐ Extremely disliked    ☐ Quite disliked  
☐ Average    ☐ Favored    ☐ Extremely favored

#### ② Footsteps

##### Perceived Frequency

- ☐ Very infrequent      ☐ Quite infrequent  
☐ Average              ☐ Quite frequent  
☐ Very frequent

##### Perceived Strength

- ☐ Extremely weak    ☐ Quite weak    ☐ Average  
☐ Quite strong      ☐ Extremely strong

##### Preference

- ☐ Extremely disliked    ☐ Quite disliked  
☐ Average    ☐ Favored    ☐ Extremely favored

#### ③ Children playing

##### Perceived Frequency

- ☐ Very infrequent      ☐ Quite infrequent  
☐ Average              ☐ Quite frequent  
☐ Very frequent

##### Perceived Strength

- ☐ Extremely weak    ☐ Quite weak    ☐ Average  
☐ Quite strong      ☐ Extremely strong

##### Preference

- ☐ Extremely disliked    ☐ Quite disliked  
☐ Average    ☐ Favored    ☐ Extremely favored

#### ④ Sweeping sounds

##### Perceived Frequency

- ☐ Very infrequent      ☐ Quite infrequent  
☐ Average                ☐ Quite frequent  
☐ Very frequent

##### Perceived Strength

- ☐ Extremely weak    ☐ Quite weak    ☐ Average  
☐ Quite strong      ☐ Extremely strong

##### Preference

- ☐ Extremely disliked    ☐ Quite disliked  
☐ Average    ☐ Favored    ☐ Extremely favored

#### ⑤ Music

##### Perceived Frequency

- ☐ Very infrequent      ☐ Quite infrequent  
☐ Average                ☐ Quite frequent  
☐ Very frequent

##### Perceived Strength

- ☐ Extremely weak    ☐ Quite weak    ☐ Average  
☐ Quite strong      ☐ Extremely strong

##### Preference

- ☐ Extremely disliked    ☐ Quite disliked  
☐ Average    ☐ Favored    ☐ Extremely favored

#### \*3. Mechanical sounds:

##### ① The sound of traffic

##### Perceived Frequency

- ☐ Very infrequent      ☐ Quite infrequent  
☐ Average                ☐ Quite frequent  
☐ Very frequent

##### Perceived Strength

- ☐ Extremely weak    ☐ Quite weak    ☐ Average  
☐ Quite strong      ☐ Extremely strong

##### Preference

- ☐ Extremely disliked    ☐ Quite disliked  
☐ Average    ☐ Favored    ☐ Extremely favored

##### ② Sound of machines

##### Perceived Frequency

- ☐ Very infrequent      ☐ Quite infrequent  
☐ Average                ☐ Quite frequent  
☐ Very frequent

##### Perceived Strength

- ☐ Extremely weak    ☐ Quite weak    ☐ Average  
☐ Quite strong      ☐ Extremely strong

##### Preference

- ☐ Extremely disliked    ☐ Quite disliked  
☐ Average    ☐ Favored    ☐ Extremely favored

### **III. Evaluation of soundscape perception in different space types**

#### **Your evaluation of the soundscape perception of your space**

##### **1. Pleasant**

- ☐ Strongly disapprove
- ☐ More disapprove
- ☐ Average
- ☐ More approve
- ☐ Strongly approve

##### **2. Harmonious**

- ☐ Strongly disapprove
- ☐ More disapprove
- ☐ Average
- ☐ More approve
- ☐ Strongly approve

##### **3. Comfortable**

- ☐ Strongly disapprove
- ☐ More disapprove
- ☐ Average
- ☐ More approve
- ☐ Strongly approve

##### **4. Rich**

- ☐ Strongly disapprove
- ☐ More disapprove
- ☐ Average
- ☐ More approve
- ☐ Strongly approve

##### **5. Varied**

- ☐ Strongly disapprove
- ☐ More disapprove
- ☐ Average
- ☐ More approve
- ☐ Strongly approve

##### **6. Quiet**

- ☐ Strongly disapprove
- ☐ More disapprove
- ☐ Average
- ☐ More approve
- ☐ Strongly approve
